# Supplementary material for: Secondary Science Teachers’ Views on Environmental Citizenship in The Netherlands
Source: MDPI journal article supplement (doi:10.3390/su13147963), 2021-07-16
Supplement: s1 [file s1]

## Supplementary Materials

# Secondary Science Teachers' Views on Environmental Citizenship in the Netherlands

Michiel van Harskamp<sup>1,\*</sup>, Marie-Christine P.J. Knippels<sup>1</sup> and Wouter R. van Joolingen<sup>1</sup>

<sup>1</sup> Freudenthal Institute, Department of Mathematics, Utrecht University, Utrecht, Netherlands; [m.vanharskamp@uu.nl](mailto:m.vanharskamp@uu.nl), [m.c.p.j.knippels@uu.nl](mailto:m.c.p.j.knippels@uu.nl), [w.r.vanjoolingen@uu.nl](mailto:w.r.vanjoolingen@uu.nl)

\* Correspondence: [m.vanharskamp@uu.nl](mailto:m.vanharskamp@uu.nl); Tel.: +31 30 253 8251

This document lists the interview questions for the teacher interviews and the corresponding coding scheme. Each code can be given once per teacher, so total number of codes is total number of teachers who answered in that category.

**Table S1.** Coding scheme for the teacher interviews belonging to question s1: How would you define sustainability? Each teacher was assigned 'Brundtland' or a combination of one maximum of 'People', 'Planet', and 'Prosperity' or none of the first four categories, and one maximum of each of the descriptive categories, if applicable.

| Category                   | Description                                                                                                                                    |
|----------------------------|------------------------------------------------------------------------------------------------------------------------------------------------|
| Brundtland                 | Brundtland-like definition, including reference to needs of the present and needs of the future, replaces People, Planet, and Prosperity codes |
| People                     | References to people/social side of sustainability, not coded if Brundtland is coded                                                           |
| Planet                     | References to planet/ecological side of sustainability, not coded if Brundtland is coded                                                       |
| Prosperity                 | References to prosperity/economical side of sustainability, not coded if Brundtland is coded                                                   |
| Environmental impact       | Environment, ecosystems, minimal impact on surroundings, no pollution, deforestation, animal suffering                                         |
| Container concept          | Very broad/vaguely defined concept, contains many meanings                                                                                     |
| Prolonged use of products  | Being considerate with product use, using products for a long time                                                                             |
| Sustainable processes      | Sustainable processes, production, efficiency, energy, resources                                                                               |
| Effects on next generation | Effects on next generation, impact on generations in the future (not selected when 'Brundtland' is chosen)                                     |
| Recycling                  | Recycling, reuse, circular processes                                                                                                           |

**Table S2.** Coding scheme for the teacher interviews belonging to question s2: Would you say sustainability belongs in your lessons? Each teacher was assigned one of the three main categories ('Yes', 'Hardly', and 'No'), and one maximum of each of the descriptive categories, if applicable.

| Category               | Description                                                                         |
|------------------------|-------------------------------------------------------------------------------------|
| Yes                    | Yes, it belongs in my lessons                                                       |
| Hardly                 | Hardly, it partially belongs in my lessons                                          |
| No                     | No, it does not belong in my lessons                                                |
| Task of school         | It is a task of the whole school, also in other subjects                            |
| Problems are topical   | Problems occur now, it is urgent, problematic, topical                              |
| Functioning in society | Important skills needed to function in society                                      |
| Raising awareness      | Raising awareness about sustainability, showing alternatives, showing ethical sides |

**Table S3.** Coding scheme for the teacher interviews belonging to question s3: Do you incorporate sustainability in your teaching? Each teacher was assigned one of the three main categories ('Yes', 'Sometimes/hardly', and 'No'), and one maximum of each of the descriptive categories, if applicable.

| Category          | Description                                                                                                                                                                            |
|-------------------|----------------------------------------------------------------------------------------------------------------------------------------------------------------------------------------|
| Yes               | Yes, I incorporate sustainability in my lessons                                                                                                                                        |
| Sometimes/hardly  | I sometimes or hardly incorporate sustainability in my lessons                                                                                                                         |
| No                | No, I do not incorporate sustainability in my lessons                                                                                                                                  |
| Curriculum & time | It is/is not part of the curriculum, there is not enough time                                                                                                                          |
| Too little        | I do not incorporate it enough, I should incorporate it more                                                                                                                           |
| When applicable   | Only if it is applicable or topical, not suitable for lower secondary                                                                                                                  |
| Recurring theme   | It is a recurring theme in my teaching                                                                                                                                                 |
| Interdisciplinary | I approach it interdisciplinarily, with teachers from other subjects, in collaboration with other subjects (not selected if teachers say sustainability is important for all subjects) |
| Theory first      | I focus on theory first                                                                                                                                                                |

**Table S4.** Coding scheme for the teacher interviews belonging to question s4: Which teaching and learning activities do you use when you teach about sustainability? Each teacher was assigned one maximum of each of these categories, if applicable.

| Category                    | Description                                                                                                       |
|-----------------------------|-------------------------------------------------------------------------------------------------------------------|
| Discussion                  | Discussion, dialogue                                                                                              |
| Research                    | Research, presentations about results                                                                             |
| Video/documentary           | Video, documentary, film, animation                                                                               |
| Authentic examples          | Concrete example, authentic situation, example from teacher's own life, examples of which the students are owners |
| Regular teaching activities | Normal teaching activities, classroom discussion, no difference with other subjects                               |
| Stakeholders, experts       | Stakeholders, experts, role playing, showing multiple perspectives                                                |
| Design/creative             | Designing something, creative activities                                                                          |
| Footprint calculation       | Calculating carbon footprint, ecological footprint                                                                |
| Group work                  | Unspecified group work, group activities                                                                          |
| Theory                      | Theory, theoretical teaching                                                                                      |
| Student behavior            | Focus on student behaviour, student actions                                                                       |
| Solutions                   | Finding solutions, improving local situation/school building                                                      |
| Game/competition            | Competition element, gamification                                                                                 |
| Not yet applicable          | Did not yet teach many sustainability lessons                                                                     |

**Table S5.** Coding scheme for the teacher interviews belonging to question s5: What learning aims do you have when teaching about sustainability? Each teacher was assigned one maximum of each of the categories, if applicable.

| Category                | Description                                                                                                                                   |
|-------------------------|-----------------------------------------------------------------------------------------------------------------------------------------------|
| Raising awareness       | Raising awareness of current situation                                                                                                        |
| Impact of behavior      | Impact of (student) behavior/choices on the environment/the world                                                                             |
| Bigger picture          | Showing the bigger picture, how things are connected                                                                                          |
| Opinions and decisions  | Focus on decision making and opinion forming                                                                                                  |
| Theory                  | Teaching theoretical background/concepts                                                                                                      |
| 21st century skills     | 21st century skills such as validity of sources, critical thinking, dealing with media and social media, lifelong learning, academic thinking |
| Behavior                | Focus on behavior, student behavior, changing their behavior                                                                                  |
| Sustainable way of life | Promoting sustainable way of life                                                                                                             |

|                             |                                                                                                                |
|-----------------------------|----------------------------------------------------------------------------------------------------------------|
| Citizenship education       | Citizenship education, taking responsibility, becoming active member of society                                |
| Solutions and possibilities | Thinking about solutions, developing solutions, showing possibilities, shifting from negative to positive view |
| No clear learning aims      | No clear learning aims specified                                                                               |

**Table S6.** Coding scheme for the teacher interviews belonging to question s6: Do you think sustainability is part of the curriculum? Each teacher was assigned one of the two main categories ('Yes' and 'Very little'), and one maximum of each of the descriptive categories, if applicable.

| Category                | Description                                                        |
|-------------------------|--------------------------------------------------------------------|
| Yes                     | Yes, sustainability is part of the curriculum                      |
| Very little             | Only very little, but it is part of the curriculum                 |
| Should be more          | There should be more sustainability in the curriculum              |
| Too theoretical         | The curriculum is too heavily focused on theory                    |
| Incorrectly represented | Sustainability is not presented in the right way in the curriculum |
| National exams          | It is part of national exams occasionally                          |

**Table S7.** Coding scheme for the teacher interviews belonging to question s7: Do you feel confident with teaching about sustainability? Each teacher was assigned one of the two main categories ('Confident' and 'Unconfident'), and one maximum of each of the descriptive categories, if applicable.

| Category          | Description                                                                 |
|-------------------|-----------------------------------------------------------------------------|
| Confident         | Yes, I feel confident                                                       |
| Unconfident       | No, I do not feel confident; I feel unconfident about certain aspects       |
| Own interest      | Teacher is interested/not interested in it                                  |
| Opinions          | Opinion forming, opinions of parents/caretakers                             |
| Complexity        | Topics are complex/difficult/multifaceted                                   |
| Not set in stone  | Not a hard truth/no clear cut answers                                       |
| Examples          | Can think of many examples, topical, authentic, story/narrative             |
| Interdisciplinary | Interdisciplinary nature of the topic, can always refer to other colleagues |

**Table S8.** Coding scheme for the teacher interviews belonging to question s8: What are the challenges with teaching about sustainability? Each teacher was assigned one maximum of each of the descriptive categories, if applicable.

| Category                          | Description                                                                                                                                                                                                      |
|-----------------------------------|------------------------------------------------------------------------------------------------------------------------------------------------------------------------------------------------------------------|
| Student involvement               | Doom scenarios of students, hopelessness, boring image, far away topic for students, no prior knowledge of students, students have heard about this too much                                                     |
| Opinions on the subject           | Opinion of the teacher/parents and caretakers/the students, extremism, politics, ethics, feelings, opinion-forming                                                                                               |
| Curriculum                        | Too little time, full curriculum, wrong interpretation of sustainability in curriculum, examination difficult, national exams, interdisciplinary nature with individual subjects, vaguely depicted in curriculum |
| Teaching and learning activities  | Discussions are difficult to guide, little to no practical assignments or activities, no suitable lesson materials, promoting behavior change is difficult                                                       |
| Traits of the subject             | Large scale of issues, complexity, abstract, difficult to define, fast developments of issues, unsolvable, open-ended nature                                                                                     |
| Conditions at school/in the world | Colleagues are not involved, many bad sources of information, creating a safe atmosphere difficult, unable to practice what you preach because of unsustainable building                                         |

**Table S9.** Coding scheme for the teacher interviews belonging to question c1: How would you define citizenship?

| Category                    | Description                                                                                                |
|-----------------------------|------------------------------------------------------------------------------------------------------------|
| Personal vs society         | Dealing with a person's relation to the people around them/their surroundings, a person's place in society |
| Socially desirable behavior | Behavior that is socially acceptable, that society wishes to see, sticking to social norms                 |
| Caring, involved, conscious | Caring for surroundings, actively taking part, caring for self, being aware of impact on surroundings      |
| 21st century skills         | Skills such as critical thinking, opinion forming, dealing with social media and media in general          |
| Development/maturation      | Developing as a person, becoming a mature person, <i>bildung</i>                                           |
| Complex/difficult           | A complex/vague/difficult concept                                                                          |
| Norms, values, ethics       | About norms, values, and ethics, ethical side, social norms, personal values                               |
| Democracy                   | Democracy, democratic society                                                                              |
| Don't know                  | Does not know how to define citizenship                                                                    |

**Table S10.** Coding scheme for the teacher interviews belonging to question c2: Would you say citizenship belongs in your lessons? Each teacher was assigned one of the three main categories ('Yes', 'Yes, whole school', and 'No'), and one maximum of each of the descriptive categories, if applicable.

| Category                   | Description                                                                                                                  |
|----------------------------|------------------------------------------------------------------------------------------------------------------------------|
| Yes                        | Yes, citizenship belongs in my lessons                                                                                       |
| Yes, whole school          | Yes, citizenship belongs in the whole school                                                                                 |
| No                         | No, citizenship does not belong in my lessons                                                                                |
| Caring for self and others | Caring for self, for others, for other organisms                                                                             |
| Ethics and opinion         | Ethics, opinion-forming, ethical subjects or topics                                                                          |
| Skills for life            | Skills necessary for the rest of your life                                                                                   |
| Technical skills           | Technical or scientific skills necessary for the rest of your life, critical thinking                                        |
| Maturation                 | Developing as a person, becoming a mature person, <i>bildung</i>                                                             |
| Effect of topic on world   | Shows the importance of the subject, shows how subject affects the world, the relationship between the subject and the world |
| Social norms               | Deals with social norms, socially acceptable behavior                                                                        |
| How to approach it         | Wonders how to approach it/how to implement it in their lessons                                                              |
| Subconsciously             | Does not deal with this explicitly, only implicitly, without thinking about it                                               |

**Table S11.** Coding scheme for the teacher interviews belonging to question c3: Do you incorporate citizenship in your teaching? Each teacher was assigned one of the four main categories ('Yes', 'Hardly', 'Only implicitly', and 'No'), and one maximum of each of the descriptive categories, if applicable.

| Category                    | Description                                                                      |
|-----------------------------|----------------------------------------------------------------------------------|
| Yes                         | Yes, I incorporate citizenship in my teaching                                    |
| Hardly                      | I sometimes incorporate citizenship in my teaching                               |
| Only implicitly             | I only implicitly incorporate citizenship in my teaching                         |
| No                          | I do not incorporate citizenship in my teaching                                  |
| Connected to sustainability | When I teach about sustainability, during sustainability education               |
| Ethics and opinion forming  | During teaching about ethical issues, opinion-forming                            |
| Health / sexuality & gender | When teaching about health, sexuality and gender                                 |
| Setting an example          | To set an example, practice what you preach                                      |
| Critical thinking           | When focusing on critical thinking, critical attitude                            |
| Too little                  | Too little, wants to incorporate more citizenship                                |
| Time / curriculum           | Curriculum is full, is not present in curriculum, needs time for other themes    |
| Theoretical / theory first  | Laying theoretical foundations first, subject is too theoretical for citizenship |

|                               |                                                                                                        |
|-------------------------------|--------------------------------------------------------------------------------------------------------|
| Difficult for lower secondary | Too difficult for lower secondary, only for upper secondary, does not belong in lower secondary        |
| News and current affairs      | When subject is in the news, current affairs, mentioning issues that happen in the real world          |
| Does not fit                  | Has no place in science subjects, belongs with other subjects                                          |
| Interdisciplinary             | In an interdisciplinary fashion, when collaborating with other subjects, not only for science subjects |
| Nature of science             | Explaining or relating to the nature of science, the scientific method, scientific thinking            |
| Connection with nature        | Promoting a relationship with nature                                                                   |

**Table S12.** Coding scheme for the teacher interviews belonging to question c4: Which teaching and learning activities do you use when you teach about citizenship? Each teacher was assigned one maximum of each of the descriptive categories, if applicable.

| Category                    | Description                                                                         |
|-----------------------------|-------------------------------------------------------------------------------------|
| Discussion                  | Discussion, dialogue                                                                |
| Regular teaching activities | Normal teaching activities, classroom discussion, no difference with other subjects |
| Group work                  | Working in groups                                                                   |
| News and current affairs    | Based on current developments, issues, news stories                                 |
| Video and documentary       | Videos, film, documentary, news item                                                |
| Research and experiments    | Doing research, experiments, practical                                              |
| Debate                      | Debate                                                                              |
| Role play/stakeholders      | Role playing, stakeholders, experts                                                 |
| Essay and writing           | Writing essays, papers, writing assignment                                          |
| Designing/creative          | Designing something, creative assignments, making something                         |
| Social science research     | Social science research, questionnaires, interviews                                 |
| None                        | No teaching and learning activities                                                 |

**Table S13.** Coding scheme for the teacher interviews belonging to question c5: What learning aims do you have when teaching about citizenship? Each teacher was assigned one maximum of each of the descriptive categories, if applicable.

| Category                         | Description                                                                                                                                                               |
|----------------------------------|---------------------------------------------------------------------------------------------------------------------------------------------------------------------------|
| 21 <sup>st</sup> century skills  | Skills such as working together, communicating, critical thinking, looking for and assessing information, opinion forming, dealing with social media and media in general |
| Opinion forming/decision making  | Forming opinions/making decisions, showing multiple sides to the story/to the issue                                                                                       |
| Caring for self and surroundings | Caring for own body/caring for surroundings                                                                                                                               |
| Raising awareness                | Raising awareness about effect of your decisions/your behaviour, here and somewhere else                                                                                  |
| None                             | Has no learning aims for citizenship                                                                                                                                      |

**Table S14.** Coding scheme for the teacher interviews belonging to question c6: Do you think citizenship is part of the curriculum? Each teacher was assigned one of the three main categories ('Yes', 'Very little', and 'No'), and one maximum of each of the descriptive categories, if applicable.

| Category                         | Description                                                                                                                                                                  |
|----------------------------------|------------------------------------------------------------------------------------------------------------------------------------------------------------------------------|
| Yes                              | Yes, citizenship is in the curriculum                                                                                                                                        |
| Very little                      | Only very little citizenship is in the curriculum                                                                                                                            |
| No                               | No, citizenship is not in the curriculum                                                                                                                                     |
| Connected to sustainability      | When I teach about sustainability, during sustainability education                                                                                                           |
| Opinion forming                  | Related to opinion forming, on ethical issues where you need to be able to form an opinion                                                                                   |
| Too little, should be more       | There is too little of it, there should be more in the curriculum                                                                                                            |
| Other subjects / at school level | For other subjects, at a school level                                                                                                                                        |
| Vague concept / loose curriculum | Citizenship is too vague, the concept is too vague, the curriculum is too vague                                                                                              |
| Strong focus on theory           | Subject is highly theory driven, theoretical subject, theory is more important                                                                                               |
| 21st century skills              | Skills such as validity of sources, communicating, critical thinking, opinion forming, dealing with social media and media in general, scientific literacy, working together |
| Health / sexuality & gender      | Issues related to health, sexuality and gender                                                                                                                               |
| Mainly for upper secondary       | Not for lower secondary, only for upper secondary, more suitable for upper secondary                                                                                         |

**Table S15.** Coding scheme for the teacher interviews belonging to question c7: Do you feel confident with teaching about citizenship? Each teacher was assigned one of the three main categories ('Confident', 'Unconfident', and 'Never implements CE'), and one maximum of each of the descriptive categories, if applicable.

| Category                  | Description                                                                                             |
|---------------------------|---------------------------------------------------------------------------------------------------------|
| Confident                 | Feels confident about teaching citizenship                                                              |
| Unconfident               | Feels unconfident about teaching (certain aspects of) citizenship                                       |
| Never implements CE       | Does not implement citizenship in their teaching                                                        |
| Guiding discussions       | Guiding discussions, conversations, opinion-forming, dialogue                                           |
| Own interest              | Is interested in citizenship/is not interested in citizenship                                           |
| Prior knowledge           | Prior knowledge from teacher education                                                                  |
| Inexperienced             | Does not teach citizenship, hardly ever happens, has little to no previous experiences with citizenship |
| Demands preparation first | Not without preparation, would like some update or training first                                       |

**Table S16.** Coding scheme for the teacher interviews belonging to question c8: What are the challenges with teaching about citizenship? Each teacher was assigned one of the three main categories ('Yes', 'Hardly', and 'No'), and one maximum of each of the descriptive categories, if applicable.

| Category                      | Description                                                                                                                                                                                    |
|-------------------------------|------------------------------------------------------------------------------------------------------------------------------------------------------------------------------------------------|
| Feeling unequipped            | Difficulties with guiding dialogue/discussion, difficulty with evaluation/assessment, how to interpret it/incorporate it in science, what does it mean, no or little experience with the topic |
| Influences on opinion forming | Teacher has an opinion too/is not neutral, opinions of other teachers/the school, opinions of parents, students copy other students during opinion-forming                                     |
| Curriculum                    | Curriculum is too full, has no time to incorporate citizenship, citizenship is scattered across different subjects                                                                             |
| Level of students             | Too difficult for lower secondary, students are not interested/are not ready for citizenship                                                                                                   |

|                           |                                                                                                                     |
|---------------------------|---------------------------------------------------------------------------------------------------------------------|
| Atmosphere in the group   | Atmosphere in the group has to be right, should create room for different opinions to coexist, depends on the class |
| Sensitivity of the topics | Topics are sensitive, religious, political, ethical, cultural differences                                           |
| No difficulties           | Teaching citizenship is not hard                                                                                    |
| Not applicable            | Does not teach citizenship                                                                                          |

**Table S17.** Coding scheme for the teacher interviews belonging to question q1: Would you say the combination of sustainability and citizenship makes sense? Each teacher was assigned one of the two main categories ('Yes' and 'No data'), and one maximum of each of the descriptive categories, if applicable.

| Category                      | Description                                                                                                       |
|-------------------------------|-------------------------------------------------------------------------------------------------------------------|
| Yes                           | Yes, the combination of sustainability and citizenship makes sense                                                |
| No data                       | This question was not asked to the interviewed teacher                                                            |
| Making choices/decisions      | Both sustainability and citizenship are about making choices and decisions                                        |
| Social aspect/part of society | Both sustainability and citizenship are about being part of society, there is a social aspect to them             |
| Effect on surroundings        | Both sustainability and citizenship are about the effect you have on your surroundings (both natural and society) |
| Consumer behavior/decisions   | Both sustainability and citizenship are about consumer behaviour, the choices that you make as a consumer         |
| Similar classroom activities  | Teaching and learning activities for sustainability and citizenship resemble each other                           |

**Table S18.** Coding scheme for the teacher interviews belonging to question q2: Do you incorporate societal issues other than sustainability in your teaching? Each teacher was assigned one of the two main categories ('Yes' and 'No'), and one maximum of each of the descriptive categories, if applicable.

| Category               | Description                                                                                                       |
|------------------------|-------------------------------------------------------------------------------------------------------------------|
| Yes                    | Yes, I teach about other societal issues                                                                          |
| No                     | No, I do not teach about any other societal issues                                                                |
| Curriculum             | Other issues are (not) in the curriculum                                                                          |
| Sex, sexuality, gender | Issues dealing with sex, sexuality, and gender                                                                    |
| Technology & society   | Issues about the impact of technology on society, genetic modification, radioactivity, cloning                    |
| Medical issues         | Medical issues, such as organ donation, vaccination                                                               |
| Ethical issues         | General ethical issues, unspecified ethical issues                                                                |
| Theoretical subject    | Subject is mainly theoretical                                                                                     |
| Life style             | Lifestyle issues, such as alcohol, drugs, smoking, obesity, nutrition                                             |
| Food industry          | Issues related to the food industry, such as agriculture, hunger and poverty, use of antibiotics in food industry |

**Table S19.** Coding scheme for the teacher interviews belonging to question q3: How would you judge your own classroom management during teaching about sustainability and citizenship? Each teacher was assigned one of the four main categories ('Easier', 'No difference', 'A little harder', and 'Harder'), and one maximum of each of the descriptive categories, if applicable.

| Category        | Description                                                                            |
|-----------------|----------------------------------------------------------------------------------------|
| Easier          | Classroom management is easier during sustainability and citizenship teaching          |
| No difference   | There is no difference in classroom management with other topics                       |
| A little harder | Classroom management is a little harder during sustainability and citizenship teaching |
| Harder          | Classroom management is harder during sustainability and citizenship teaching          |

|                                |                                                                                                                                             |
|--------------------------------|---------------------------------------------------------------------------------------------------------------------------------------------|
| Discussion and opinions        | Guiding a discussion, reaching learning aims during discussion, motivating students for taking part in discussion                           |
| Safe classroom environment     | Creating a safe classroom environment, building a good relationship with the class, atmosphere needs to be right                            |
| Innovative learning activities | More innovative teaching and learning activities, different from before, more diverse set of learning activities                            |
| Teacher's own interest         | Own interest of the teacher in sustainability and citizenship                                                                               |
| Ensuring hearing everyone      | Making sure everyone can have a say, creating room for everyone                                                                             |
| Student ownership              | Students are owner of own learning process, students are taken seriously, responsibility lies with the students, teacher is only supporting |
| Energetic students             | Highly energetic or intensely active students                                                                                               |
| Contexts and authenticity      | Authentic contexts, from the real world, fast developments in the field                                                                     |
| Preparations required          | Needs preparation, not going in without preparing                                                                                           |
| Group work                     | Guiding group work                                                                                                                          |
| Assessment                     | Assessment and evaluation                                                                                                                   |

**Table S20.** Coding scheme for the teacher interviews belonging to question q4: How motivated are your students when you teach about sustainability and citizenship? Each teacher was assigned one of the four main categories ('Easy', 'Depends', 'No difference', and 'Challenge'), and one maximum of each of the descriptive categories, if applicable.

| Category                                    | Description                                                                                                                                                                      |
|---------------------------------------------|----------------------------------------------------------------------------------------------------------------------------------------------------------------------------------|
| Easy                                        | It is easy to motivate students for sustainability and citizenship                                                                                                               |
| Depends                                     | It depends how easy it is to motivate students for sustainability and citizenship                                                                                                |
| No difference                               | There is no difference with other topics concerning motivation                                                                                                                   |
| Challenge                                   | It is a challenge to motivate students for sustainability and citizenship                                                                                                        |
| Closeness of the topic                      | Topics are close to/far away from the students, they recognize it in their daily lives/it only plays far away, it is about their own future, they have an opinion about this     |
| Specific students are interested            | Specific students are interested in this, more at certain levels/with certain backgrounds, differs per class                                                                     |
| Depends on topic                            | Depends on the topic, some are interesting on their own, some less so, some are boring                                                                                           |
| Authenticity/real world problems            | Authenticity, keep it authentic, not from the book, students feel they are being taken seriously                                                                                 |
| Tired of/knowledgeable about sustainability | Students are tired about sustainability, they feel like they know everything already, boring image, students have a lot of prior knowledge                                       |
| Students focus on themselves                | Students are focused on their own lives/bodies, they are in puberty, not dealing with the outside world                                                                          |
| Opinions and discussion                     | Students like to give their opinion, have an opinion about this, want to share their ideas                                                                                       |
| Topical, current affairs                    | These issues are topical, dealing with current affairs, mainly now is this motivating for them, march for climate, it is more motivating for them now than a couple of years ago |
| Enthusiasm of teacher                       | Teacher is enthusiastic about the topic, can use their own enthusiasm to motivate students                                                                                       |
| Emotional investment                        | Students are emotionally invested with the topic, are very worried, have bleak images of the future, are past hope, desperate                                                    |
| Some resistance at first                    | There is a little resistance at first, but after that motivation is easy                                                                                                         |
| Open-ended                                  | Many options or examples for the teacher, these issues are open-ended, teachers can use many contexts                                                                            |



**Table S21.** Coding scheme for the teacher interviews belonging to question q5: How does the amount of teaching and learning activities that you have at your disposal for teaching about sustainability and citizenship relate to colleagues? Each teacher was assigned one of the four main categories ('More', 'Same as colleagues', 'Less' and 'Don't know').

| Category           | Description                                                                                                       |
|--------------------|-------------------------------------------------------------------------------------------------------------------|
| More               | I have more teaching and learning activities for sustainability and citizenship at my disposal than my colleagues |
| Same as colleagues | We have the same amount of teaching and learning activities for sustainability and citizenship at our disposal    |
| Less               | I have less teaching and learning activities for sustainability and citizenship at my disposal than my colleagues |
| Don't know         | I do not know how to compare this/I have no idea                                                                  |
